# Supplementary material for: Determination of the Transport Efficiency in spICP-MS Analysis Using Conventional Sample Introduction Systems: An Interlaboratory Comparison Study
Source: MDPI journal article supplement (doi:10.3390/nano12040725), 2022-02-21
Supplement: s1 [file s1]

## Supplementary Materials – SM7

### HAADF-STEM-EDX Image of Non-Gold Particles Detected in Product N8151035 at High Magnification

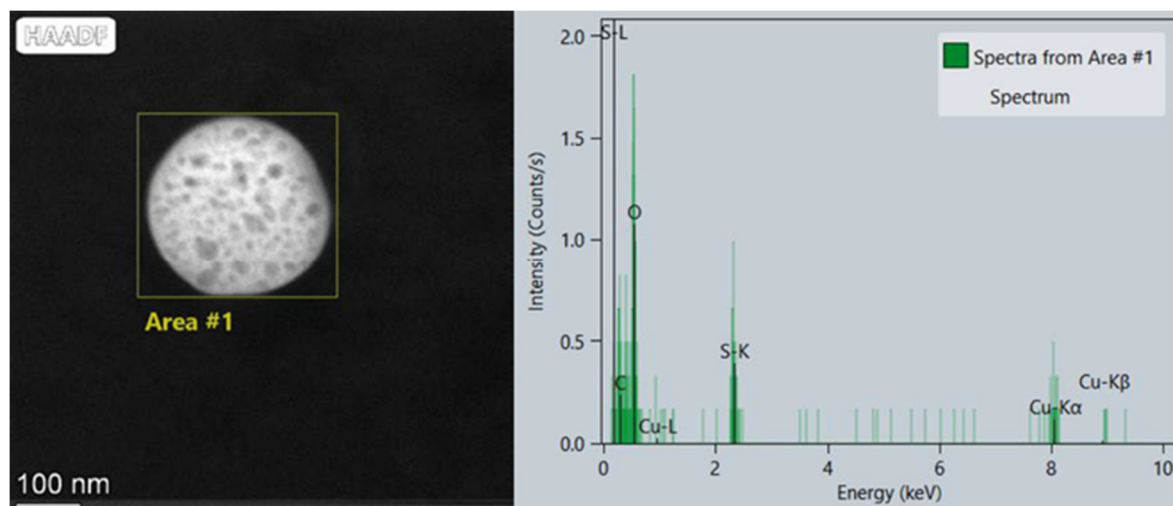

**Figure S7.** HAADF-STEM-EDX image of non-gold particles detected in product N8151035 at high magnification ( $\times 12600$ ) (left) and corresponding EDX spectrum (right) showing the elemental composition for Area 1
