# Supplementary material for: Determination of the Transport Efficiency in spICP-MS Analysis Using Conventional Sample Introduction Systems: An Interlaboratory Comparison Study
Source: MDPI journal article supplement (doi:10.3390/nano12040725), 2022-02-21
Supplement: s1 [file s1]

## Supplementary Materials – SM5

### Responses of Ionic Gold Solutions Prepared in Ultrapure Water and in 1.5 mM Sodium Citrate

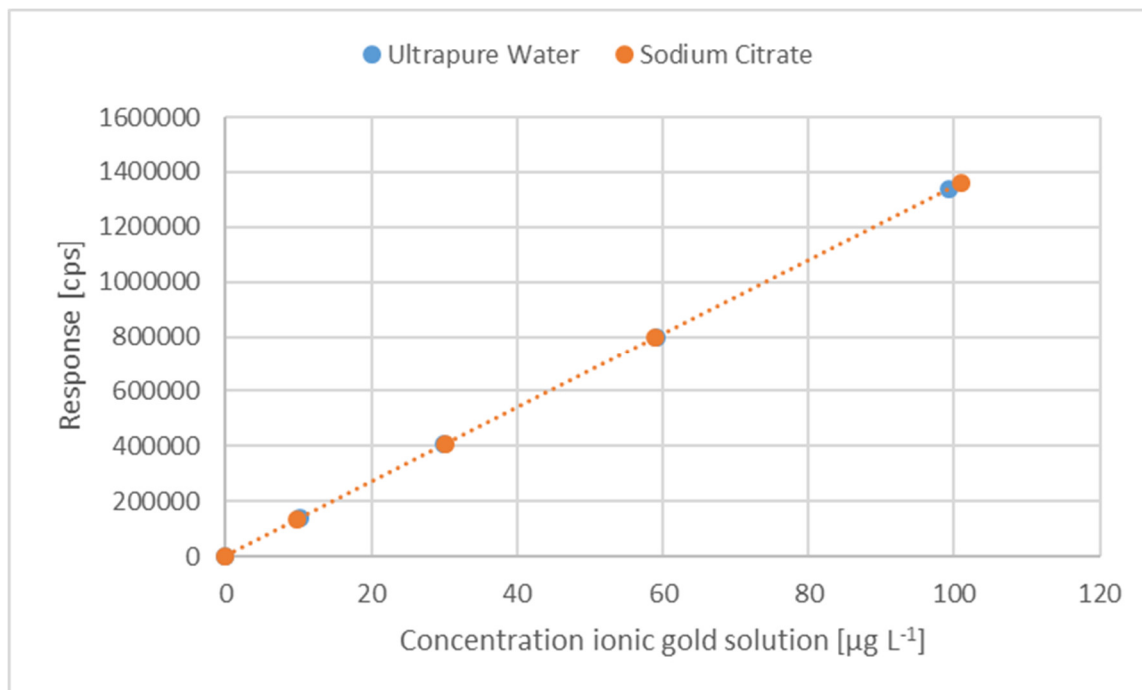

**Figure S5.** Responses of ionic gold solutions prepared in ultrapure water and in 1.5 mM sodium citrate
