# Supplementary material for: Determination of the Transport Efficiency in spICP-MS Analysis Using Conventional Sample Introduction Systems: An Interlaboratory Comparison Study
Source: MDPI journal article supplement (doi:10.3390/nano12040725), 2022-02-21
Supplement: s1 [file s1]

# Supplementary Materials – SM12

## Determination of Transport Efficiency Following the DMF Approach

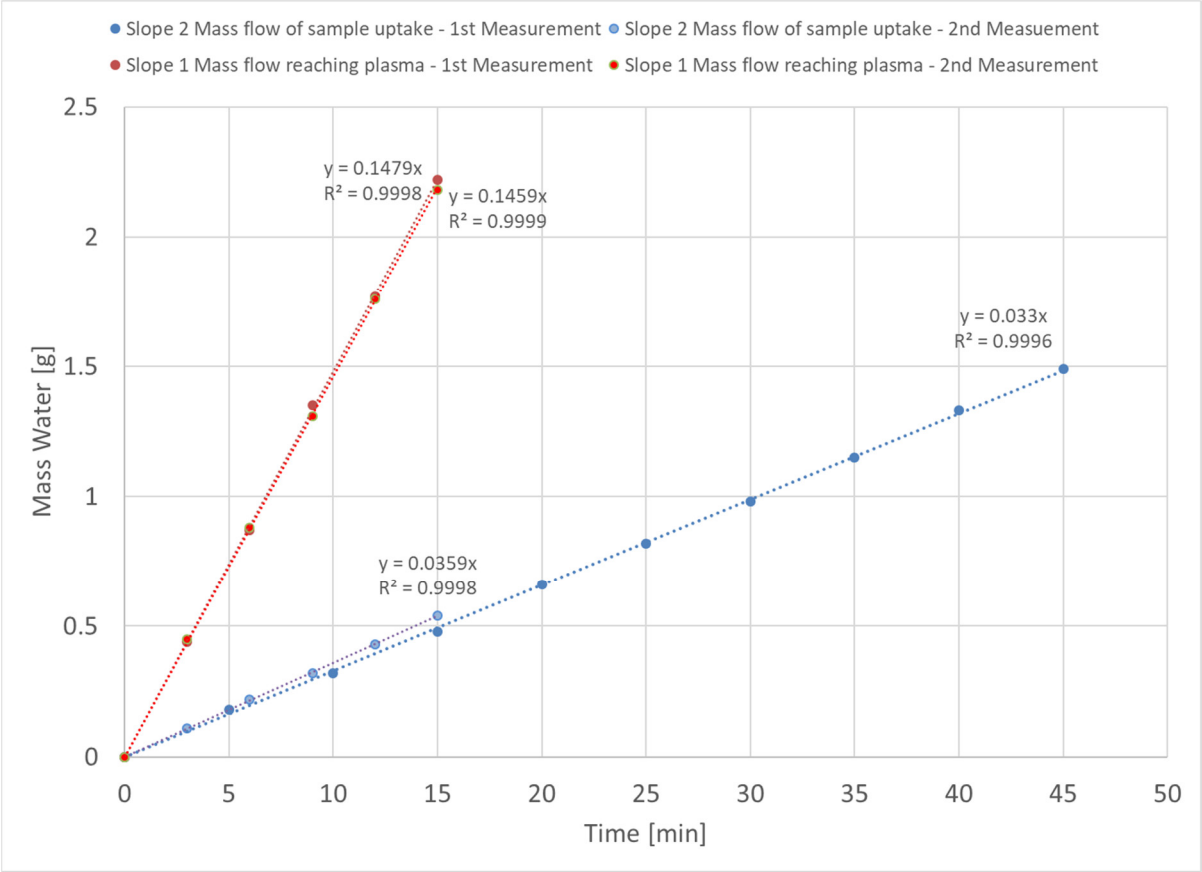

**Figure S12.** Determination of transport efficiency following the DMF approach. Red lines: Slope 2 from the regression analysis representing mass flow of sample uptake, blue lines: Slope 1 from the regression analysis representing mass flow reaching plasma.
