# Supplementary material for: Determination of the Transport Efficiency in spICP-MS Analysis Using Conventional Sample Introduction Systems: An Interlaboratory Comparison Study
Source: MDPI journal article supplement (doi:10.3390/nano12040725), 2022-02-21
Supplement: s1 [file s1]

# Supplementary Materials – SM1

## Protocol for the Determination of the Gold Concentration after Digestion

### 1. Preparation of Reagents

- a) 1L Nitric Acid (1,5%)  
23 mL of 65% Nitric acid in ultrapure water

### 2. Calibration Curve (0 – 20 ppb), Internal Standard Thallium (Tl) at 10 ppb

- a) Working Solutions

#### Ionic Gold Working Solution

Gold (1000 ppm → 10 ppm)

250 µL of Mothersolution (1000 ppm) in 25 mL 1.5% HNO<sub>3</sub>

#### Ionic Thallium Solution

Thallium (1000 ppm → 10 ppm)

250 µL of Mothersolution (1000 ppm) in 25 mL 1.5% HNO<sub>3</sub>

- b) Calibration Curve

|        | Conc.<br>[ppb] | Dilution Factor from<br>Working Solution | Volume of Au+ Working Solution<br>in 50 mL HNO <sub>3</sub> 1,5%<br>[µL] | Volume of Thallium<br>Working Solution in 50<br>mL HNO <sub>3</sub> 1,5%<br>[µL] |
|--------|----------------|------------------------------------------|--------------------------------------------------------------------------|----------------------------------------------------------------------------------|
| Cal 0  | 0              |                                          | 0                                                                        | 50 (=10 ppb)                                                                     |
| Cal 5  | 5              | 2000                                     | 25                                                                       | 50 (=10 ppb)                                                                     |
| Cal 10 | 10             | 1000                                     | 50                                                                       | 50 (=10 ppb)                                                                     |
| Cal 15 | 15             | 666.6667                                 | 75                                                                       | 50 (=10 ppb)                                                                     |
| Cal 20 | 20             | 500                                      | 100                                                                      | 50 (=10 ppb)                                                                     |

### 3. Sample preparation

Add 100 µL of sample suspensions (concentration should be around 50ppm) into 50 mL Falcon tube

Add 0.15 mL Nitric Acid (65%)

Add 1.5 mL Hydrochloric Acid (37%)

Let sit at RT for 1h

Add 500 µL of Internal standard working solution (10 ppm)

Bring to volume (50 mL) with ULTRAPURE WATER

Dilute 1:10 with Nitric Acid (1.5%)

### **Blank Sample**

Same as above but no gold suspension

### **4. Recovery Check**

Add 500 µL of ionic gold working solution (10 ppm)

Add 0.15 mL Nitric Acid (65%)

Add 1.5 mL Hydrochloric Acid (37%)

Let sit at RT for 1h

Add 500 µL of Internal standard working solution (10 ppm)

Bring to volume (50 mL) with ULTRAPURE WATER

Dilute 1:10 with Nitric Acid (1.5%)
