# Supplementary material for: Determination of the Transport Efficiency in spICP-MS Analysis Using Conventional Sample Introduction Systems: An Interlaboratory Comparison Study
Source: MDPI journal article supplement (doi:10.3390/nano12040725), 2022-02-21
Supplement: s1 [file s1]

## Supplementary Materials – SM6

### Scanning Electron Microscopy (SEM) Images of the Constituent Particles of the Six Test Materials

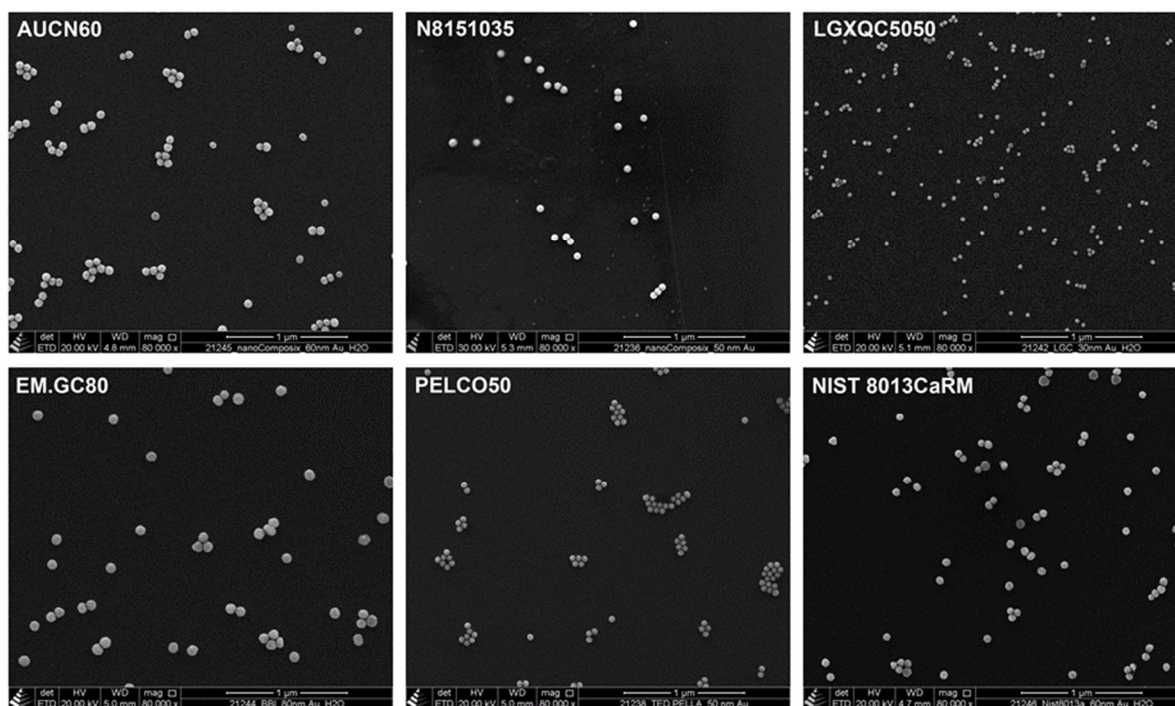

**Figure S6.** SEM images resulting from the image analysis of the constituent particles of the six test materials.
