# Supplementary material for: Determination of the Transport Efficiency in spICP-MS Analysis Using Conventional Sample Introduction Systems: An Interlaboratory Comparison Study
Source: MDPI journal article supplement (doi:10.3390/nano12040725), 2022-02-21
Supplement: s1 [file s1]

## Indicative Sample Dilution Schemes for the Determination of TES and TEF

Table 4. a. Required dilution of tested products to reach 100000 particles mL<sup>-1</sup>. Instruments with micro-second dwell-times.

|                                                                | AUCN60                                     | N8151035                         | LGCQC5050                                  | EM.GC80                                     | PELCO50                                    | NISTCaRM                                   |
|----------------------------------------------------------------|--------------------------------------------|----------------------------------|--------------------------------------------|---------------------------------------------|--------------------------------------------|--------------------------------------------|
| Size [nm]                                                      | 61                                         | 49.6                             | 32.7                                       | 78.8                                        | 51                                         | 60                                         |
| Conc. [ $\mu\text{g/mL}$ ]                                     | 54                                         | 0.0124                           | 45.1                                       | 46.4                                        | 53                                         | 51.2                                       |
| First Dilution Step                                            |                                            |                                  |                                            |                                             |                                            |                                            |
| Dilution [1:X]                                                 | 200                                        | 100                              | 1000                                       | 200                                         | 200                                        | 200                                        |
| Volume of undiluted product in X mL 1.5 mM Na3-Citrate         | 50 $\mu\text{L}$ in 10 mL Citrate          | 50 $\mu\text{L}$ in 5 mL Citrate | 50 $\mu\text{L}$ in 50 mL Citrate          | 50 $\mu\text{L}$ in 10 mL Citrate           | 50 $\mu\text{L}$ in 10 mL Citrate          | 50 $\mu\text{L}$ in 10 mL Citrate          |
| Second Dilution Step                                           |                                            |                                  |                                            |                                             |                                            |                                            |
| Dilution [1:X]                                                 | 1177                                       | No 2 <sup>nd</sup> step required | 1276                                       | 457                                         | 1976                                       | 1177                                       |
| Volume of 1 <sup>st</sup> step dilution in X mL 1.5 mM Citrate | 42.5 $\mu\text{L}$ in 50 mL 1.5 mM Citrate |                                  | 39.2 $\mu\text{L}$ in 50 mL 1.5 mM Citrate | 109.4 $\mu\text{L}$ in 50 mL 1.5 mM Citrate | 25.3 $\mu\text{L}$ in 50 mL 1.5 mM Citrate | 42.5 $\mu\text{L}$ in 50 mL 1.5 mM Citrate |

Table S4b. Required dilution of tested products to reach 100000 particles mL<sup>-1</sup>. Instruments with milli-second dwell-times

|                                                                | AUCN60                       | N8151035                         | LGCQC5050                    | EM.GC80                      | PELCO50                      | NISTCaRM                     |
|----------------------------------------------------------------|------------------------------|----------------------------------|------------------------------|------------------------------|------------------------------|------------------------------|
| First Dilution Step                                            |                              |                                  |                              |                              |                              |                              |
| Dilution [1:X]                                                 | 1000                         | 250                              | 1000                         | 1000                         | 1000                         | 1000                         |
| Volume of undiluted product in X mL 1.5 mM Na-Citrate          | 10 µL in 10 mL Citrate       | 40 µL in 10 mL Citrate           | 10 µL in 10 mL Citrate       | 10 µL in 10 mL Citrate       | 10 µL in 10 mL Citrate       | 10 µL in 10 mL Citrate       |
| Second Dilution Step                                           |                              |                                  |                              |                              |                              |                              |
| Dilution [1:X]                                                 | 10                           | No 2 <sup>nd</sup> step required | 10                           | 10                           | 10                           | 10                           |
| Volume of 1 <sup>st</sup> step dilution in X mL 1.5 mM Citrate | 1 mL in 10 mL 1.5 mM Citrate |                                  | 1 mL in 10 mL 1.5 mM Citrate | 1 mL in 10 mL 1.5 mM Citrate | 1 mL in 10 mL 1.5 mM Citrate | 1 mL in 10 mL 1.5 mM Citrate |
| Third Dilution Step                                            |                              |                                  |                              |                              |                              |                              |
| Dilution [1:X]                                                 | 10                           |                                  | 10                           | 10                           | 10                           | 10                           |
| Volume of 2 <sup>nd</sup> step dilution in X mL 1.5 mM Citrate | 1 mL in 10 mL 1.5 mM Citrate |                                  | 1 mL in 10 mL 1.5 mM Citrate | 1 mL in 10 mL 1.5 mM Citrate | 1 mL in 10 mL 1.5 mM Citrate | 1 mL in 10 mL 1.5 mM Citrate |
| Fourth Dilution Step                                           |                              |                                  |                              |                              |                              |                              |

| Dilution [1:X]                                                       | 10                                 | 10                                 | 10                                 | 10                                 | 10                                 |
|----------------------------------------------------------------------|------------------------------------|------------------------------------|------------------------------------|------------------------------------|------------------------------------|
| Volume of 3 <sup>rd</sup> step<br>dilution in X mL 1.5<br>mM Citrate | 1 mL in<br>10 mL 1.5 mM<br>Citrate |
