# Supplementary material for: Determination of the Transport Efficiency in spICP-MS Analysis Using Conventional Sample Introduction Systems: An Interlaboratory Comparison Study
Source: MDPI journal article supplement (doi:10.3390/nano12040725), 2022-02-21
Supplement: s1 [file s1]

## Supplementary Materials – SM8

### Particle Size Distributions of the Minimum Feret Diameter, the (Maximum) Feret diameter, the Equivalent Circular Diameter and the Aspect Ratio of all tested Products

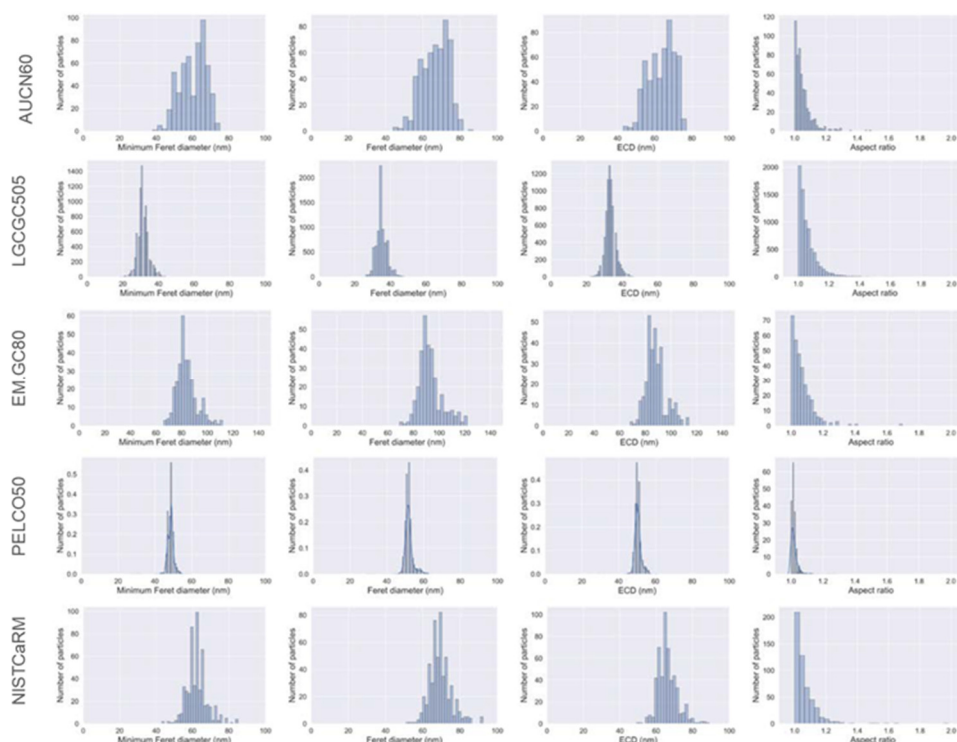

**Figure S8a.** Particle size distributions of the minimum Feret diameter, the (maximum) Feret diameter, the equivalent circular diameter and the aspect ratio of all tested products except test material N8151035

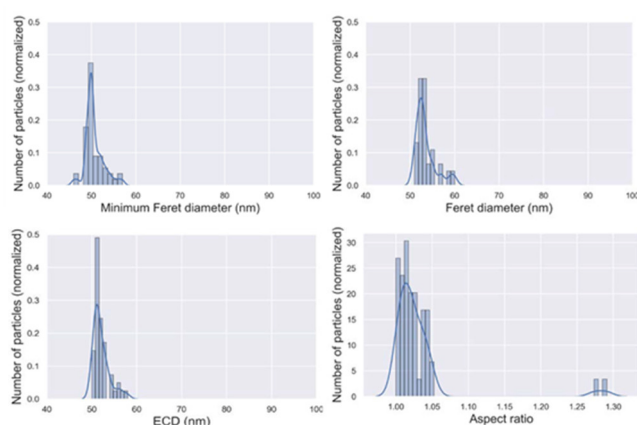

**Figure S8b.** Particle size distributions of the minimum Feret diameter, the (maximum) Feret diameter, the equivalent circular diameter and the aspect ratio of test material N8151035
