# Supplementary material for: Determination of the Transport Efficiency in spICP-MS Analysis Using Conventional Sample Introduction Systems: An Interlaboratory Comparison Study
Source: MDPI journal article supplement (doi:10.3390/nano12040725), 2022-02-21
Supplement: s1 [file s1]

## Supplementary Materials – SM3

### Protocol for the Determination of TES and TEF

*(Protocol circulated to ILC participants)*

The guidance has been optimised for the Perkin Elmer instruments with a dwell-time of 100  $\mu$ s. For other instruments some of the (dilution) steps possibly require adjustments.

#### 1. Materials

| Material identification                   | Declared Concentration<br>[ $\mu$ g mL <sup>-1</sup> ]                  | Size – Diameter<br>[nm] |
|-------------------------------------------|-------------------------------------------------------------------------|-------------------------|
| NanoComposix<br>(AUCN60)                  | 54                                                                      | 61 $\pm$ 7              |
| Perkin Elmer Ultra-Uniform<br>(N8151035)  | 0.0124                                                                  | 49.6 $\pm$ 2.1          |
| LGC<br>(LGCQC5050)                        | 45.1 $\pm$ 1.5                                                          | 32.7 $\pm$ 2.0          |
| BBI Solutions<br>(EM.GC80)                | Not declared on certificate.<br>We (JRC) have found 45.2 $\pm$ 1.1 ppm. | 78.8 $\pm$ 8%           |
| Ted Pella - PELCO Highly Uniform (90,050) | 53                                                                      | 51 $\pm$ 2              |
| NIST Candidate Material                   | 60 (nominal)                                                            | 50 (nominal)            |

#### 2. Preparation of dispersant

All ionic gold solutions and NP-suspensions are prepared in 1,5 mM Na-Citrate. Together with the Au-NP suspensions, the parcel contains also a few grams of Citrate (Sigma-Aldrich 71,402).

To prepare 1L of 1.5 mM Na<sub>3</sub>-Citrate solutions, solve 441.15 mg in 1 L ultrapure water.

#### 3. Sample Flow Measurement

- 3.1 Make sure the speed of the peristaltic pump is set correctly
- 3.2 Measure the suction flow rate of the pump by weighing difference with a tube filled with water over a period of at least 20 min.
- 3.3 Calculate the flow rate in mL min<sup>-1</sup> considering the density of the water at 1 g mL<sup>-1</sup> and note the values in the attached Excel file (one for each day of analysis).

(If appropriate) set the instrument software for the **determination of Transport Efficiency by Particle Size Method (TES)**.

#### 4. Preparation of Ionic Gold Calibration curve

##### 4.1 Stock standard of ionic gold ( $1 \text{ mg L}^{-1} - 1 \text{ ppm}$ )

4.1.1 Transfer 50  $\mu\text{L}$  of 1000 ppm solution into a 50 mL Falcon tube and bring to volume (50 mL) with ultrapure water. ( $\rightarrow$  by weighing - note exact weights)

4.1.2 Label and store refrigerated ( $4^\circ\text{C}$ ) at dark.

##### 4.2 Working standards of ionic gold ( $0 - 10 \mu\text{g L}^{-1}$ or ppb)

According to table 1 pipet the volumes of the stock standard (4.1) into a 50 mL Falcon tube and bring to volume with ultrapure water. Mix thoroughly.

The working standard needs to be prepared freshly each day of analysis.

Table 1. Working standards for ionic Gold

| Concentration<br>[ $\mu\text{g L}^{-1}$ ] | Name                  | Dilution of Stock<br>standard | Volume of Stock<br>standard [ $\mu\text{L}$ ] | Final<br>volume<br>[mL] |
|-------------------------------------------|-----------------------|-------------------------------|-----------------------------------------------|-------------------------|
| 0 (Blank)                                 | Au <sup>+</sup> Blank | -                             | 0                                             | 50                      |
| 1                                         | Au <sup>+</sup> Std 1 | 1:1000                        | 50                                            | 50                      |
| 3                                         | Au <sup>+</sup> Std 2 | 1:333,33                      | 150                                           | 50                      |
| 5                                         | Au <sup>+</sup> Std 3 | 1:200                         | 250                                           | 50                      |
| 10                                        | Au <sup>+</sup> Std 4 | 1:100                         | 500                                           | 50                      |

#### 5. Preparation of NP Gold calibration curve (independent preparations $\rightarrow$ 3 replicates/material)

Depending on the particle-size and the mass-concentration of the starting product, the dilutions need to be adjusted to reach approximately 100.000 particles  $\text{mL}^{-1}$ .

Except for the very diluted product distributed by Perkin Elmer (N8151035), all other products need two dilution steps.

**NOTE:** The reported dilution to 100000 particles  $\text{mL}^{-1}$  is used by way of example only and can be considered valid for instruments working at  $\mu\text{s}$  dwell time ranges. For ms dwell-time ranges, a higher dilution might be required.

##### 5.1 First dilution Step

5.1.1 Let the monodisperse spherical gold nanoparticle suspension reach room temperature and bath sonicate for 300s at the maximum power.

5.1.2 Vortex stir for 30 s

5.1.3 Prepare 1<sup>st</sup> dilution steps (**by weighing**) as described in the table

|                                                                    | AUCN60                 | N8151035              | LGCQC5050              | EM.GC80                | Ted Pella              |
|--------------------------------------------------------------------|------------------------|-----------------------|------------------------|------------------------|------------------------|
| Size [nm]                                                          | 61                     | 49.6                  | 32.7                   | 78.8                   | 51                     |
| Conc.<br>[µg/mL]                                                   | 54                     | 0.0124                | 45.1                   | 45.2                   | 53                     |
| Dilution<br>[1:X]                                                  | 200                    | 100                   | 1000                   | 200                    | 200                    |
| Volume of undiluted product in X mL 1.5mM Na <sub>3</sub> -Citrate | 50 µL in 10 mL Citrate | 50 µL in 5 mL Citrate | 50 µL in 50 mL Citrate | 50 µL in 10 mL Citrate | 50 µL in 10 mL Citrate |

5.1.4 If not immediately used, label and store in refrigerator (4 °C) at dark.

5.1.5 If properly stored, the stock standard suspension can be considered stable for at least one day.

## 5.2 Working standard gold nanoparticles

(Target concentration ca 100.000 particles mL<sup>-1</sup>)

5.2.1 Prepare the following second dilutions (**by weighing**) to reach the desired 100.000 particles mL<sup>-1</sup>.

|                                                                | AUCN60                          | N8151035                         | LGCQC5050                       | EM.GC80                          | Ted Pella                       |
|----------------------------------------------------------------|---------------------------------|----------------------------------|---------------------------------|----------------------------------|---------------------------------|
| Size [nm]                                                      | 61                              | 49.6                             | 32.7                            | 78.8                             | 51                              |
| Conc.<br>[µg/mL]                                               | 54                              | 0.0124                           | 45.1                            | 45.2                             | 53                              |
| Dilution<br>[1:X]                                              | 1177                            | No 2 <sup>nd</sup> step required | 1276                            | 457                              | 1976                            |
| Volume of 1 <sup>st</sup> step dilution in X mL 1.5 mM Citrate | 42.5 µL in 50 mL 1.5 mM Citrate |                                  | 39.2 µL in 50 mL 1.5 mM Citrate | 109.4 µL in 50 mL 1.5 mM Citrate | 25.3 µL in 50 mL 1.5 mM Citrate |

For details of calculation, please see Annex 1 and excel file provided via email

Please, note the value of the theoretical particle number concentration (part/mL) in the attached Excel file for all the Gold Standards

### 5.2.2 Vortex stir for 30 s

The Transport Efficiency (TE) is automatically determined by the instrument's software. Please note the values of both Transport Efficiency and Particle number (events) per scan time in the attached Excel file.

#### Determination of transport efficiency by particle frequency method (TEF)

The data required to (manually) calculate the **transport efficiency by frequency** can be extracted from the same data file acquired for the determination of TE by size:

| Sample | Analyte | Most Freq. Size (nm) | Mean Size (nm) | No. of Peaks | Mean Inten. (counts) | Part. Conc. (parts/mL) |
|--------|---------|----------------------|----------------|--------------|----------------------|------------------------|
| Blank  | Au 197  |                      |                |              |                      |                        |
| STD1   | Au 197  |                      |                |              |                      |                        |
| STD2   | Au 197  |                      |                |              |                      |                        |
| STD3   | Au 197  |                      |                |              |                      |                        |
| STD4   | Au 197  |                      |                |              |                      |                        |
| Blank  | Au 197  |                      |                |              |                      |                        |
| STD1   | Au 197  |                      |                | 1893         | 122.51               |                        |

*Handwritten notes:* "Ionic" is written next to the first five rows. "Particle" is written next to the last two rows, with a red arrow pointing to the "No. of Peaks" value (1893) in the STD1 row.

Please use the following equations:

- Detected Particle number per mL = Particle number (events) per scan time (min)/flow rate ( $\text{mL} \cdot \text{min}^{-1}$ )
- TEF = Detected Particle number per mL / Theoretic Particle number per mL

Calculation of TEF is done automatically by filling the attached Excel file with the required values.

---

#### SAMPLE SEQUENCE (one for each day of test)

##### Ionic Calibration

Au<sup>+</sup> Blank (ultrapure water)

Au<sup>+</sup> Std 1

Au<sup>+</sup> Std 2

Au<sup>+</sup> Std 3

Au<sup>+</sup> Std 4

##### Samples

Np-Au Blank (1.5 mM Na<sub>3</sub>-Citrate)

AUCN60-1 (Replicate 1)

AUCN60-1 as sample for QC

Np-Au Blank (1.5 mM Na<sub>3</sub>-Citrate)

AUCN60-2 (Replicate 2)

AUCN60-2 as sample for QC

Np-Au Blank (1.5 mM Na<sub>3</sub>-Citrate)

AUCN60-2 (Replicate 3)

AUCN60-2 as sample for QC

Np-Au Blank (1.5 mM Na<sub>3</sub>-Citrate)

N8151035-1 (Replicate 1)

N8151035-1 as sample for QC

Np-Au Blank (1.5 mM Na<sub>3</sub>-Citrate)

N8151035-2 (Replicate 2)

N8151035-2 as sample for QC

Np-Au Blank (1.5 mM Na<sub>3</sub>-Citrate)

N8151035-2 (Replicate 3)

N8151035-2 as sample for QC

... (same pattern for other products)
