# Supplementary material for: Determination of the Transport Efficiency in spICP-MS Analysis Using Conventional Sample Introduction Systems: An Interlaboratory Comparison Study
Source: MDPI journal article supplement (doi:10.3390/nano12040725), 2022-02-21
Supplement: s1 [file s1]

## Supplementary Materials – SM2

### Determination of the Gold Mass-Concentration in Gold-Nanoparticle Suspension Test Materials by ICP-OES – Detailed Procedure

Gold-nanoparticle suspensions were thoroughly homogenized with a vortex mixer. Then, 100  $\mu\text{L}$  aliquots were weighed in duplicate in 50 mL PP test tubes and digested at room temperature for one hour with a mixture of 150  $\mu\text{L}$   $\text{HNO}_3$  (69% w/w) and 1500  $\mu\text{L}$   $\text{HCl}$  (37% w/w). The volume of the resulting digests was brought to 50 mL with ultrapure water prior to ICP-OES analysis. Blank samples (*i.e.* 100  $\mu\text{L}$  of ultrapure water) and QC samples (*i.e.* 500  $\mu\text{L}$  of 10  $\text{mg L}^{-1}$  ionic gold solution) were prepared in duplicate and analyzed following the same procedure for quality control purposes. ICP-OES measurements were performed using an Avio 500 system (Perkin Elmer, Waltham, MA, US) equipped with a 2  $\text{mL min}^{-1}$  SeaSpray nebulizer and monitoring Au emission at 242.795 nm. Calibration was achieved using matrix-matched Au standards (0 – 50 – 100 – 150 – 200  $\mu\text{g L}^{-1}$  in 3% v/v  $\text{HCl}$  and 0.3% v/v  $\text{HNO}_3$ ) prepared from an intermediate ionic gold solution at 10  $\text{mg L}^{-1}$ .
