# Supplementary material for: Determination of the Transport Efficiency in spICP-MS Analysis Using Conventional Sample Introduction Systems: An Interlaboratory Comparison Study
Source: MDPI journal article supplement (doi:10.3390/nano12040725), 2022-02-21
Supplement: s1 [file s1]

## Supplementary Materials – SM10

### Stability of Shipped Samples – Simulation

Undiluted aliquots of the two assessed products were transferred into the same 2 mL vials also used when shipping samples to ILC participants. At defined periods in time (1,2,4,7,9, 17 days), portions were taken from the vials to prepare particle suspensions of 100,000 particles m L<sup>-1</sup>. The diluted suspensions were then used to determine the transport efficiency by size and by frequency according to the protocol detailed in SM1. Samples were stored at 4 °C in the dark with the exception of the period highlighted in pink in the figure below. In this period samples were left at room temperature to simulate shipping conditions.

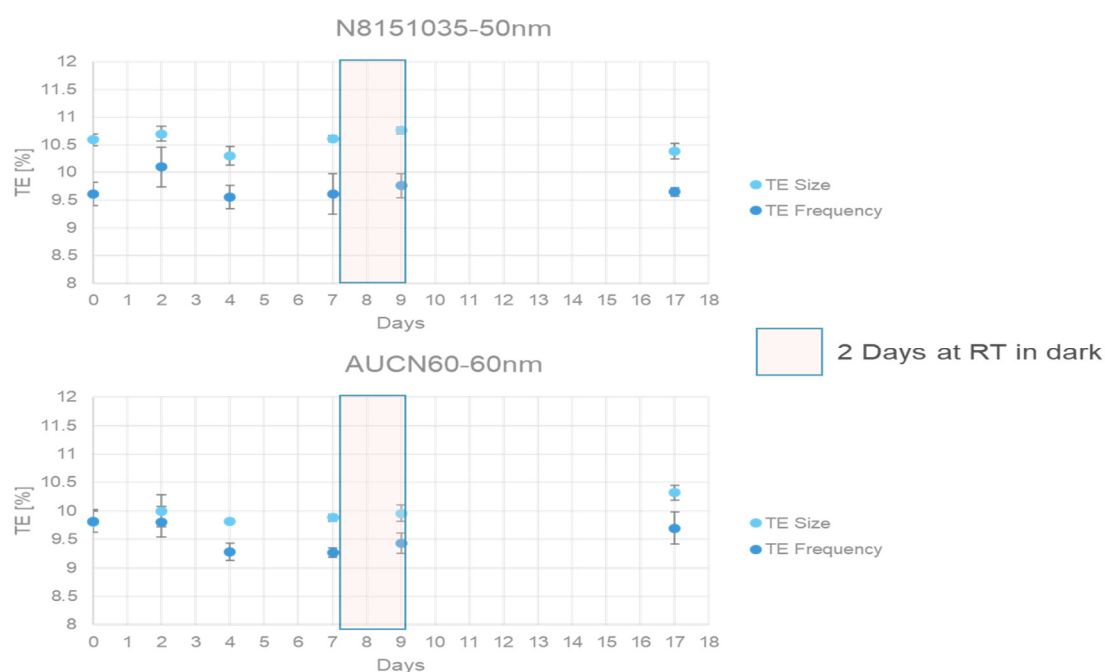

**Figure S10.** Transport efficiencies (TES and TEF) determined at defined time intervals. Samples were stored at 4 °C except for the period shaded in pink where they were stored at RT
