# Supplementary material for: Determination of the Transport Efficiency in spICP-MS Analysis Using Conventional Sample Introduction Systems: An Interlaboratory Comparison Study
Source: MDPI journal article supplement (doi:10.3390/nano12040725), 2022-02-21
Supplement: s1 [file s1]

## Supplementary Materials – SM9

### Comparisons within each Laboratory of TES and TEF by AuNP and Multiple Comparisons of the Transport Efficiencies Calculated using Either the size or the Frequency Approach with different AuNPs

**Table S9.** Comparisons within each laboratory of TES and TEF by AuNP and multiple comparisons of the transport efficiencies calculated using either the size or the frequency approach with different AuNPs. TES and TEF are shown as means and standard deviations (SD).

| Laboratory   | AuNPs     | TES %<br>Mean (SD)         | Multiple comparisons     | TEF %<br>Mean (SD) | Multiple comparisons    |
|--------------|-----------|----------------------------|--------------------------|--------------------|-------------------------|
| <b>Lab 1</b> | AUCN60    | 7.85 (0.41) <sup>oo</sup>  | EM.GC80 vs AUCN60**      | 6.11 (0.51)        | EM.GC80 vs LGCQC5050*** |
|              | EM.GC80   | 6.05 (0.24)                | EM.GC80 vs PELCO50*      | 6.10 (0.37)        | EM.GC80 vs PELCO50***   |
|              | LGCQC5050 | 10.58 (0.67) <sup>oo</sup> | EM.GC80 vs LGCQC5050***  | 8.46 (0.80)        | AUCN60 vs LGCQC5050**   |
|              | N8151035  | 7.42 (0.42) <sup>oo</sup>  | NISTCaRM vs AUCN60*      | 6.41 (0.52)        | AUCN60 vs PELCO50***    |
|              | NISTCaRM  | 6.36 (0.35)                | NISTCaRM vs LGCQC5050*** | 6.66 (0.36)        | N8151035 vs LGCQC5050*  |
|              | PELCO50   | 7.55 (0.42) <sup>oo</sup>  |                          | 8.76 (0.76)        | N8151035 vs PELCO50**   |
| <b>Lab 2</b> | AUCN60    | 11.45 (0.51) <sup>oo</sup> | EM.GC80 vs PELCO50***    | 10.04 (0.36)       | EM.GC80 vs PELCO50***   |
|              | EM.GC80   | 9.61 (0.27)                | EM.GC80 vs LGCQC5050***  | 9.54 (0.32)        | EM.GC80 vs LGCQC5050*** |
|              | LGCQC5050 | 12.89 (0.37)               | N8151035 vs PELCO50*     | 13.05 (0.72)       | NISTCaRM vs LGCQC5050*  |
|              | N8151035  | 11.19 (0.47) <sup>oo</sup> | N8151035 vs LGCQC5050**  | 10.39 (0.36)       | AUCN60 vs LGCQC5050**   |
|              | NISTCaRM  | 11.11 (0.08)               | AUCN60 vs LGCQC5050*     | 9.78 (0.08)        | AUCN60 vs PELCO50**     |
|              | PELCO50   | 12.70 (0.32)               |                          | 12.96 (0.72)       |                         |
| <b>Lab 3</b> | AUCN60    | 6.16 (1.23)                |                          | 6.30 (0.42)        |                         |
|              | EM.GC80   | 5.95 (0.94) <sup>o</sup>   |                          | 4.70 (0.34)        |                         |
|              | LGCQC5050 | 8.11 (0.79) <sup>o</sup>   | NISTCaRM vs LGCQC5050**  | 6.18 (0.30)        | EM.GC80 vs AUCN60*      |
|              | N8151035  | 6.70 (0.50)                | EM.GC80 vs LGCQC5050*    | 5.94 (0.16)        | EM.GC80 vs PELCO50***   |
|              | NISTCaRM  | 5.46 (0.46)                |                          | 4.74 (0.60)        | NISTCaRM vs PELCO50**   |
|              | PELCO50   | 7.34 (0.47)                |                          | 7.01 (0.13)        |                         |
| <b>Lab 4</b> | AUCN60    | 6.46 (0.40) <sup>o</sup>   |                          | 6.17 (0.25)        |                         |
|              | EM.GC80   | 6.20 (0.42) <sup>oo</sup>  | EM.GC80 vs LGCQC5050***  | 5.40 (0.13)        | EM.GC80 vs LGCQC5050*** |
|              | LGCQC5050 | 7.73 (0.47)                | EM.GC80 vs PELCO50***    | 7.78 (0.27)        | EM.GC80 vs PELCO50***   |
|              | N8151035  | 6.81 (0.40) <sup>oo</sup>  | AUCN60 vs LGCQC5050**    | 6.25 (0.28)        | AUCN60 vs LGCQC5050*    |
|              | NISTCaRM  | -                          | AUCN60 vs PELCO50**      | -                  | AUCN60 vs PELCO50*      |
|              | PELCO50   | 7.78 (0.44)                |                          | 7.85 (0.36)        | N8151035 vs PELCO50*    |
| <b>Lab 5</b> | AUCN60    | 12.71 (0.72) <sup>oo</sup> | EM.GC80 vs LGCQC5050***  | 4.14 (1.03)        | AUCN60 vs N8151035**    |
|              | EM.GC80   | 11.26 (0.55) <sup>oo</sup> | EM.GC80 vs PELCO50**     | 5.93 (0.71)        | AUCN60 vs LGCQC5050**   |
|              | LGCQC5050 | 17.31 (1.05) <sup>oo</sup> | N8151035 vs LGCQC5050**  | 9.25 (0.97)        | AUCN60 vs PELCO50***    |
|              | N8151035  | 12.56 (0.73) <sup>oo</sup> | NISTCaRM vs LGCQC5050**  | 8.76 (0.51)        | NISTCaRM vs LGCQC5050*  |
|              | NISTCaRM  | 12.64 (0.73) <sup>oo</sup> | AUCN60 vs LGCQC5050*     | 5.34 (0.99)        | NISTCaRM vs PELCO50***  |
|              | PELCO50   | 14.29 (0.91) <sup>oo</sup> |                          | 12.26 (0.61)       | EM.GC80 vs PELCO50**    |
| <b>Lab 6</b> | AUCN60    | 11.13 (0.78) <sup>oo</sup> |                          | 7.41 (0.90)        | AUCN60 vs N8151035*     |
|              | EM.GC80   | 11.04 (0.77) <sup>oo</sup> | EM.GC80 vs LGCQC5050***  | 8.37 (0.91)        | AUCN60 vs LGCQC5050***  |
|              | LGCQC5050 | 14.63 (0.93) <sup>oo</sup> | EM.GC80 vs PELCO50***    | 12.48 (0.76)       | AUCN60 vs PELCO50***    |
|              | N8151035  | 12.44 (0.82) <sup>oo</sup> | AUCN60 vs LGCQC5050***   | 10.4 (0.56)        | NISTCaRM vs LGCQC5050** |
|              | NISTCaRM  | 12.44 (0.82) <sup>oo</sup> | AUCN60 vs PELCO50**      | 8.34 (0.69)        | NISTCaRM vs PELCO50**   |
|              | PELCO50   | 13.95 (0.98) <sup>oo</sup> |                          | 12.86 (0.80)       | EM.GC80 vs LGCQC5050**  |
|              |           |                            |                          |                    | EM.GC80 vs PELCO50**    |

|                                                                                                              |           |                            |                         |             |                        |
|--------------------------------------------------------------------------------------------------------------|-----------|----------------------------|-------------------------|-------------|------------------------|
| <b>Lab 7</b>                                                                                                 | AUCN60    | 8.81 (0.54)                |                         | 6.72 (2.84) |                        |
|                                                                                                              | EM.GC80   | 8.44 (0.50) <sup>°°</sup>  | EM.GC80 vs LGCQC5050*** | 7.33 (0.23) | EM.GC80 vs LGCQC5050** |
|                                                                                                              | LGCQC5050 | 11.51 (1.18) <sup>°°</sup> | EM.GC80 vs PELCO50***   | 8.77 (0.98) | EM.GC80 vs PELCO50***  |
|                                                                                                              | N8151035  | 9.13 (0.41)                | AUCN60 vs LGCQC5050**   | 9.05 (0.3)  | NISTCaRM vs N8151035*  |
|                                                                                                              | NISTCaRM  | 9.34 (0.57) <sup>°°</sup>  | AUCN60 vs PELCO50**     | 7.55 (0.65) | NISTCaRM vs PELCO50**  |
|                                                                                                              | PELCO50   | 11.27 (0.70) <sup>°°</sup> | N8151035 vs LGCQC5050*  | 9.48 (0.68) | AUCN60 vs PELCO50*     |
| °p<0.05, °°p<0.01 TES vs TEF                                                                                 |           |                            |                         |             |                        |
| *p<0.05, **p<0.01, ***p<0.001 multiple comparisons of the TEs by AuNP (using either the TES or TEF approach) |           |                            |                         |             |                        |
